# Supplementary material
Source: publisher figshare collection journal article supplement (https://acs.figshare.com/ndownloader/files/24939421)
Supplement: Supplementary file 1 [file 24939421]

# Unprecedented uniform 3D growth integration of 10-layer stacked Si nanowires on tightly confined sidewall grooves

Ruijin Hu<sup>†</sup>, Shun Xu<sup>†</sup>, Junzhuan Wang<sup>†\*</sup>, Yi Shi<sup>†</sup>, Jun Xu<sup>†</sup>, Kunji Chen<sup>†</sup> and Linwei Yu<sup>†\*</sup>

<sup>†</sup> National Laboratory of Solid State Microstructures/School of Electronics Science and  
Engineering/Collaborative Innovation Centre of Advanced Microstructures, Nanjing University,  
210093 Nanjing, P. R. China, Email : [wangjz@nju.edu.cn](mailto:wangjz@nju.edu.cn), [yulinwei@nju.edu.cn](mailto:yulinwei@nju.edu.cn)

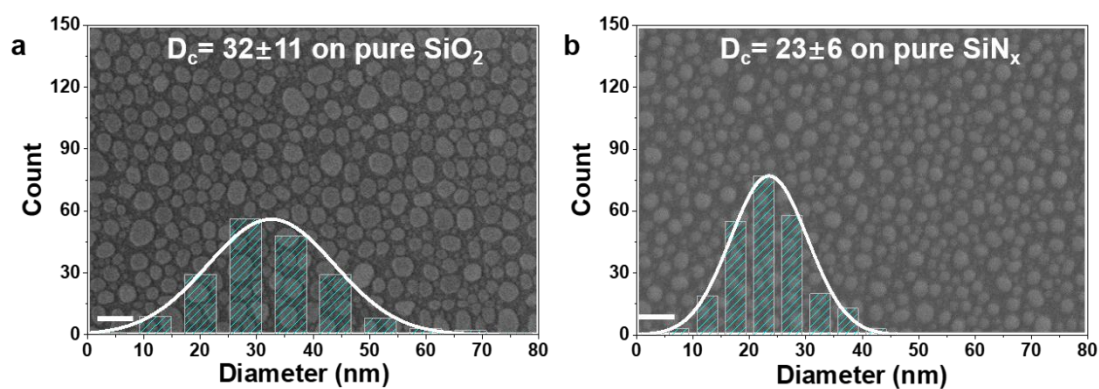

**Figure S1.** SEM images and catalyst size distribution statistics of the In droplets deposited via EBE evaporation upon the (a) SiO<sub>2</sub> and (b) SiN<sub>x</sub> substrates.

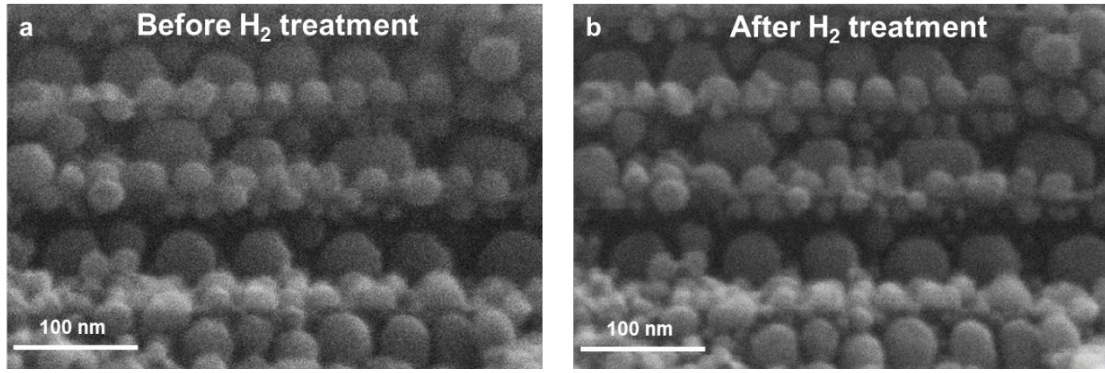

**Figure S2.** (a) and (b) show SEM images of the In droplets evaporated on the hetero-SiO<sub>2</sub>/SiN<sub>x</sub> sidewall grooves before and after H<sub>2</sub> plasma treatment, respectively.

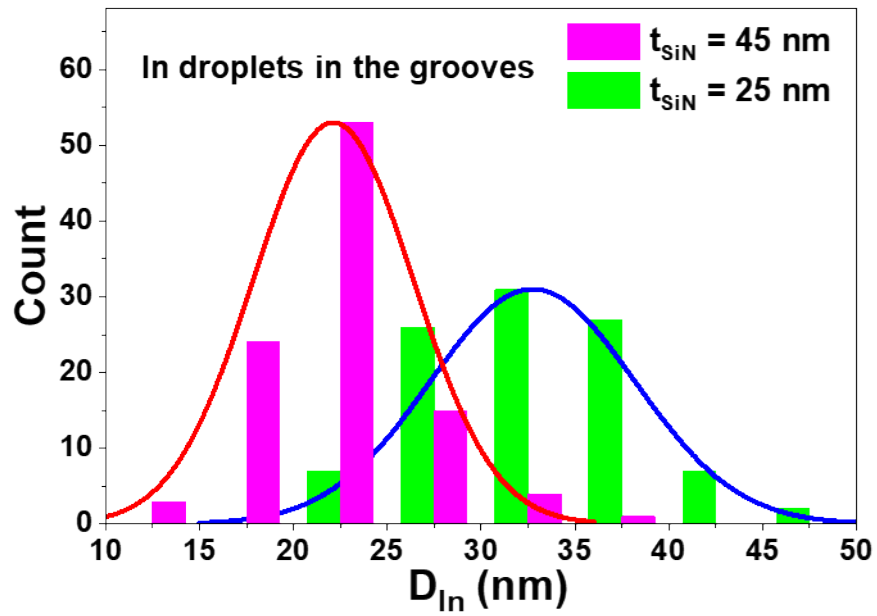

**Figure S3.** Statistics on the diameter distributions of the In droplets formed in the grooves with different SiN<sub>x</sub> edge thicknesses.
